# Supplementary material for: The amniotic fluid proteome changes across gestation in humans and rhesus macaques
Source: PubMed Central journal article supplement (PMC10562452; doi:10.1038/s41598-023-44125-3), 2023-10-09

### Supplemental Figure 2. Enrichment of tissue-specific signatures associated with gestational age in humans.

Tissue enrichment analysis was performed in all proteins associated with gestational age in human amniotic fluid, separately for up- and down-regulated proteins. For each enriched tissue, we summarized expression of all proteins over-represented in that tissue using a Z-score normalized to abundance at the earliest gestational age. The tissue-specific trajectories over gestational age are shown for upregulated (top) and downregulated (bottom) proteins separately for human samples (left) and for the same proteins in rhesus samples (right).

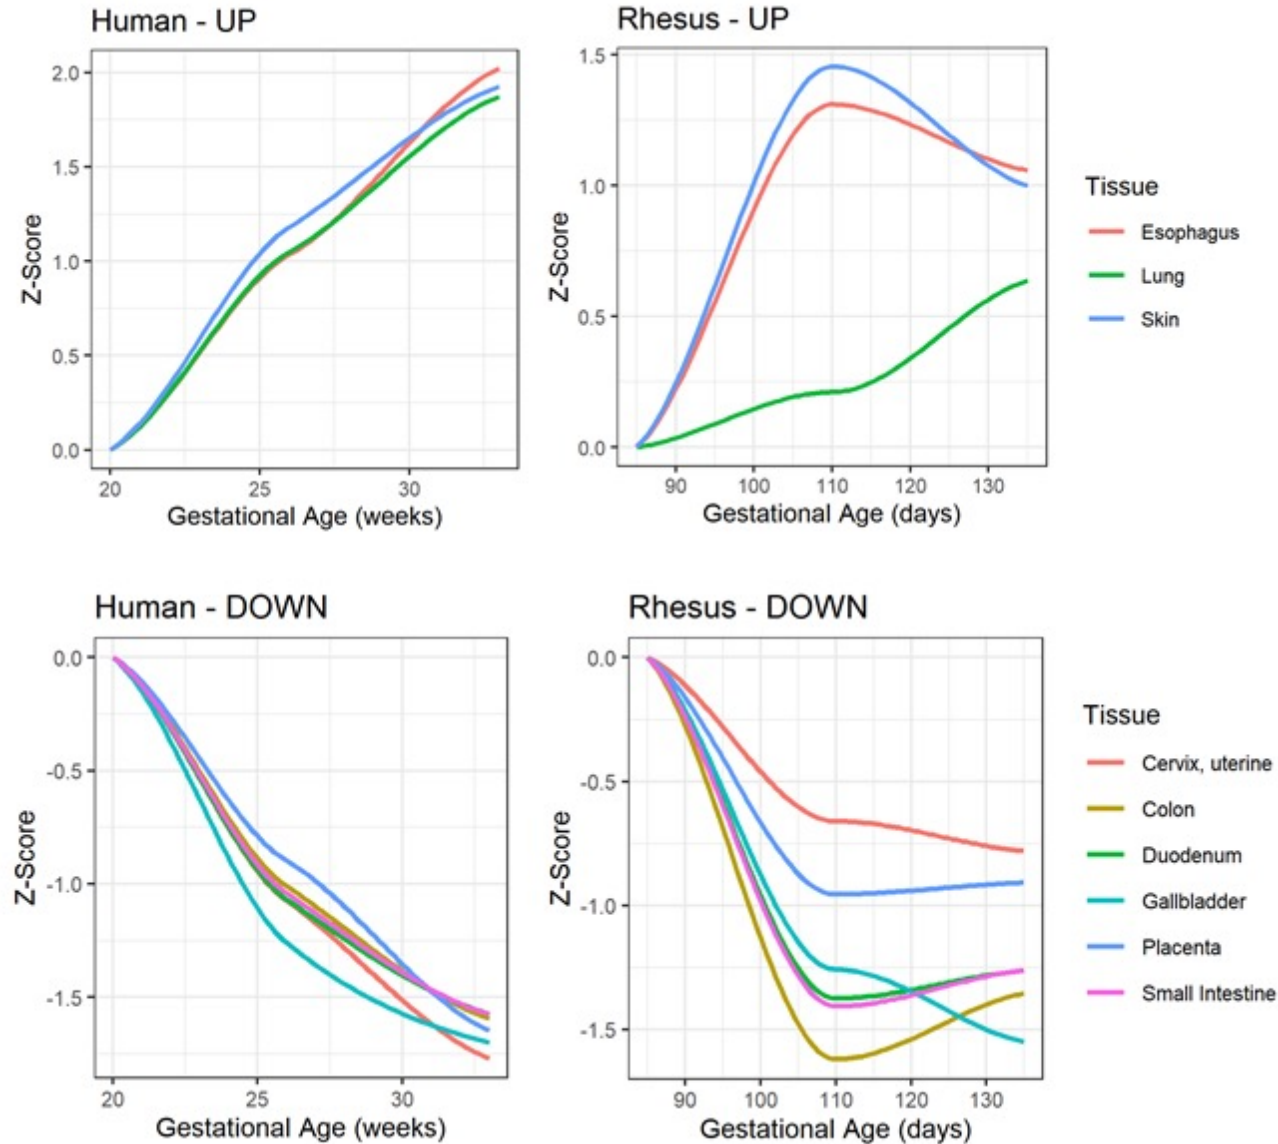

Supplement: 41598_2023_44125_MOESM3_ESM.pdf [file 41598_2023_44125_MOESM3_ESM.pdf]
