# Supplementary material for: The amniotic fluid proteome changes across gestation in humans and rhesus macaques
Source: PubMed Central journal article supplement (PMC10562452; doi:10.1038/s41598-023-44125-3), 2023-10-09

**Supplemental Figure 3. Gestational age associated protein changes are consistent with previous study.** Venn diagram (A) showing the overlap of amniotic fluid proteins associated with gestational age in human samples from this study with proteins associated with gestational age in a study by **Bhatti et al.**<sup>18</sup>. **The scatterplot (B) shows the correlation of effect size in this study on the y-axis (in units of change per day of gestation) with the effect size in the Bhatti et al. study (units reflect change from mid-gestation to term).**

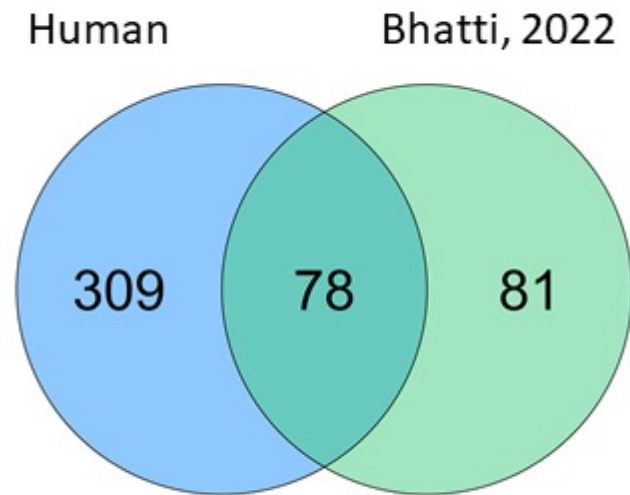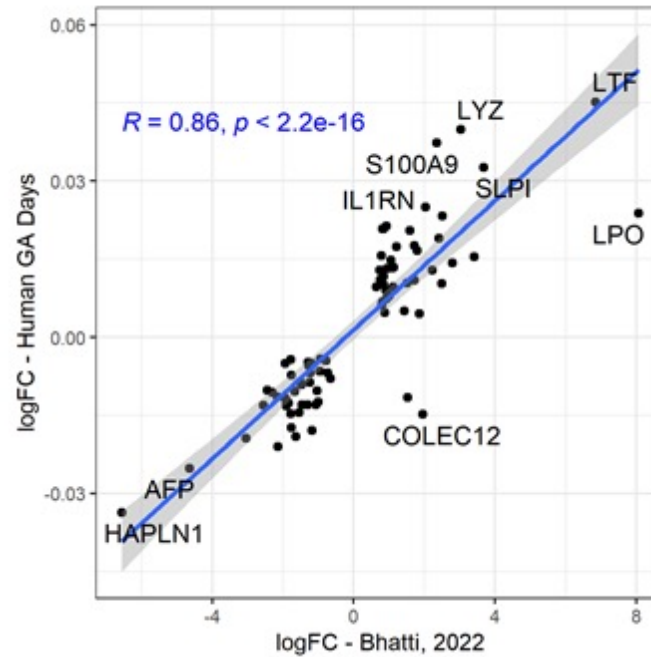

Supplement: 41598_2023_44125_MOESM4_ESM.pdf [file 41598_2023_44125_MOESM4_ESM.pdf]
